# Supplementary material for: Seasonal wildfire aerosols in Southeast Asia and Southern China disrupt the Hadley circulation
Source: Research Square preprint supplement (doi:10.21203/rs.3.rs-4263182/v1), 2024-06-10
Supplement: Supplementary file 1 [file 0dadac4efa3375a35fcd188d.docx]

**CSRM**

CSRM simulations are performed with the Advanced Research Weather Research and Forecasting (ARW) model. What makes this model appropriate for our purposes is the simulation of interactions between size distributions of aerosols and hydrometeors. This simulation of microphysics follows a bin scheme49,50. This bin scheme is one of most popular bin schemes and has been used in numerous studies of cloud-aerosol-precipitation interactions and proven to simulate them with good confidence51-53. A size distribution function for each class of hydrometeors, which are classified into water drops, ice crystals (plate, columnar and branch types), snow aggregates, graupel and hail, is represented with 33 mass doubling bins, i.e., the mass of a particle mk in the kth bin is determined as mk = 2mk-1. Each of hydrometeors has its own terminal velocity that varies with the hydrometeor mass and the sedimentation of hydrometeors is simulated using their terminal velocity.

Size distribution functions for aerosols, which act as cloud condensation nuclei (CCN) and ice-nucleating particles (INPs), adopt the same mass doubling bins as for hydrometeors. The evolution of aerosol size distribution at each grid point is controlled by aerosol sinks and sources such as aerosol advection, turbulent mixing and activation. It is assumed that aerosols do not sediment by themselves, but rather move around by airflow such as horizontal flow, updrafts, downdrafts and turbulent motions, at the same speed as the airflow itself. Taking activation as an example of the evolution of aerosol size distribution, the bins of the aerosol spectra that correspond to activated particles are emptied. Activated aerosol particles are included in hydrometeors and move to different classes and sizes of hydrometeors through collision-coalescence. When hydrometeors with aerosol particles precipitate to the surface, those particles are removed from the atmosphere. A cloud-droplet nucleation parameterization based on Kӧhler theory represents cloud-droplet nucleation. Arbitrary aerosol mixing states and aerosol size distributions can be fed to this parameterization. Parameterizations, which consider contact, immersion, condensation-freezing, and deposition nucleation paths by taking into account the size distribution of INP, temperature and supersaturation, represent heterogeneous ice-crystal nucleation57,58. Homogeneous aerosol (or haze particle) and droplet freezing is also considered following a theory that calculates the critical supersaturation at which CCN freeze homogeneously59.

The effects of the smaller subgrid-scale turbulent motions on the resolved flow are parameterized based on the most widely used method54,55. In this method, the mixing time scale is defined to be the norm of the strain rate tensor56. The Rapid Radiation Transfer Model (RRTM)60 has been coupled to the bin microphysics scheme. Aerosols before their activation can affect radiation by changing the reflection, scattering and absorption of radiation. This radiative effect of aerosol is represented61. In this representation, the internal aerosol mixture and the ARW relative humidity are used to calculate the hygroscopic growth of the aerosol particles as well as their optical properties. In practice, optical property calculations with the consideration of hygroscopic growth are performed offline prior to simulation and stored in lookup tables. Those calculations are performed for the prescribed aerosol size distribution, composition and unit concentration. During model integration, grid point number concentration and relative humidity determine the lookup table entries that specify the grid point aerosol optical properties and are supplied into the RRTM to simulate the radiative effect of aerosol. The effective sizes of hydrometeors are calculated in the bin scheme, and the calculated sizes are transferred to the RRTM to consider effects of particle size on radiation. The presence of aerosol perturbs the radiative fluxes reaching the surface and their subsequent partitioning into sensible and latent heat fluxes (i.e., the Bowen ratio). This is accounted for with the interactive Noah land surface model62.

**Simulations**

For the three-dimensional CSRM simulations to gauge impacts of fire-produced aerosols on clouds and precipitation for the SO and MA fires, the horizontal resolution of the model is set at 2 km. In the vertical domain, the model is composed of 50 layers, extending up to 50 hPa. This results in an average resolution of ~400 m for the vertical domain. For the initial and boundary conditions of simulations, European center for medium-range weather forecasts ReAnalysis Interim (ERAI) data is used. The ERAI dataset has a horizontal resolution of approximately 0.75° x 0.75° and a temporal resolution of 6 hours63. Environmental conditions (e.g., temperature, humidity and wind), which are imposed as the initial and boundary conditions, in the ERAI data are averaged over the 39-year period between 1980 and 2018 for each day and each month. Then, simulations for the SO fire are performed for a period from 00:00 UTC on September 1st to 00:00 UTC on September 2nd in the domain described in Figure 1. Simulations for the MA fire are performed for a period from 00:00 UTC on March 1st to 00:00 UTC on March 2nd in the same domain as described in Figure 4 but for latitudes between 10°S and 40°N to save computational cost.

According to the aerosol robotic network (AERONET) measurement available in March, April, September and October over the 39-year period and over both of the domains in Figures 1 and 4, on average, aerosols are an internal mixture of 65 % ammonium sulfate, 27% organic compound and 8% black carbon. For all simulations, aerosol chemical composition in this study for the calculation of aerosol effects on radiation and activation is assumed to be represented by this mixture in the whole domain during the whole simulation period. Based on the AERONET observation, the shape of the initial size distribution of aerosols acting as CCN is assumed to follow a bimodal lognormal distribution in all parts of the domain during the whole simulation period. The modal radius of this distribution is 0.11 and 1.20 μm, and the standard deviation of this distribution is 1.71 and 1.92, while the partition of aerosol number, which is normalized by the total aerosol number of the size distribution, is 0.999 and 0.001 for accumulation and coarse modes, respectively.

The MERRA-2 AOD is matched up with the particulate matter (PM) data, which is the surface PM2.5 data more specifically, and this is done at each AERONET-measurement location over both the domains in Figures 1 and 4, and at each AERONET-measurement time point in March, April, September and October over the 39-year period. Using this match-up, the regression analysis between the AOD and PM2.5 is performed and using the regression curve from this analysis, we find a PM2.5 value corresponding to an AOD value at each location in the simulation domains64-67. Then, the PM2.5 value is translated into an aerosol number concentration at the surface, which is applied to simulations, using the above-assumed aerosol composition and size distribution68,69. It is assumed that the aerosol number concentration does not vary from the surface to the top of the planetary boundary layer (PBL) and the concentration reduces exponentially with height above the PBL top.
